# Supplementary material for: Being a Participant Matters: Event-Related Potentials Show That Markedness Modulates Person Agreement in Spanish
Source: Front Psychol. 2019 Apr 24;10:746. doi: 10.3389/fpsyg.2019.00746 (PMC6491576; doi:10.3389/fpsyg.2019.00746)
Supplement: Supplementary file 2 [file Table_2.XLSX]

## Sheet: RAW DATA
	GRAMMATICALITY: PERCENTAGE OF CORRECT RESPONSES					THIRD-PERSON-SG SUBJECT + THIRD -PERSON-SG VERB (GRAMMATICAL)_250-450ms MEAN AMPLITUDE
PARTICIPANT	THIRD-PERSON-SG SUBJECT + THIRD-PERSON-SG VERB (GRAMMATICAL, CONDITION 1)	THIRD-PERSON-SG SUBJECT + FIRST-PERSON-SG VERB (UNGRAMMATICAL, CONDITION 2)	FIRST-PERSON-SG SUBJECT + FIRST-PERSON-SG VERB (GRAMMATICAL, CONDITION 3)	FIRST-PERSON-SG SUBJECT + THIRD-PERSON-SG VERB (UNGRAMMATICAL, CONDITION 4)		Fp1	Fp2	F3	F4	C3	C4	P3	P4	O1	O2	F7	F8	T7	T8	P7	P8	Fz	Cz	Pz	IO	FC1	FC2	CP1	CP2	FC5	FC6	CP5	CP6	FT9	FT10	F1	F2	C1	C2	P1	P2	AF3	AF4	FC3	FC4	CP3	CP4	PO3	PO4
1	97.5	100	97.5	100		3.73755	5.31489	0.459868	0.447555	-1.5509	-1.98042	-1.7597	-1.05374	-4.64586	-4.63592	1.66549	3.92801	0.805456	1.39298	-0.754961	-0.107995	0.03492	-1.38634	-2.44232	6.88757	-0.926859	-1.47203	-1.52992	-1.5836	1.13168	0.920356	-0.601831	-0.298571	1.46077	3.57964	-0.522099	-0.547094	-2.60996	-1.87004	-2.22055	-1.89736	1.7887	2.10243	0.010803	-1.0519	-1.08515	-1.13018	-3.80244	-3.4666
2	100	97.5	100	97.5		5.09787	2.82291	0.237897	-1.05321	-2.15413	-1.64688	3.89374	3.44825	3.73689	2.12135	2.52843	2.04909	-0.283631	0.849513	3.09873	3.53329	-2.61633	-3.16346	2.18862	5.76738	-4.17962	-4.12523	0.802097	0.535573	0.12385	-1.78536	1.17221	2.8847	-0.127533	2.40297	-2.55307	-3.60687	-2.73415	-2.11407	3.17788	2.58839	1.81263	0.924967	-2.50463	-3.07924	0.926351	1.42352	5.09922	2.66253
3	95	95	100	95		4.80376	6.56038	3.32064	2.71658	0.878758	0.266377	-2.5242	-2.93556	-2.40433	-3.58732	3.00887	4.07549	1.25741	0.494671	-1.14834	-2.55306	3.25207	-0.26759	-3.82599	7.12495	1.01901	0.646351	-0.463389	-1.83912	2.23393	2.30766	-0.048497	-1.22014	1.1816	2.77409	1.75503	2.5194	0.536288	-0.437943	-1.68075	-3.31055	3.28077	3.99494	1.42261	1.11234	0.036333	-1.28359	-2.89562	-3.86578
4	95	72.5	100	97.5		2.97461	3.8117	1.47142	1.42268	-0.382206	-0.294558	-0.191602	-0.393803	0.114033	-0.074537	1.61659	2.24298	0.288609	0.45373	0.420438	0.908065	1.16328	-0.993237	-1.54344	2.69155	-0.230087	-0.381787	-1.02861	-1.21911	0.900253	0.797846	0.247445	-0.120841	1.03572	1.20722	1.09377	1.70192	-0.910843	-0.780963	-0.545975	-1.06875	2.61715	2.21511	0.23225	0.198641	-0.502568	-0.412901	0.241795	-0.643601
5	100	85	97.5	100		6.42171	6.56374	5.83421	3.8613	2.11114	-2.01932	-1.17789	-2.67298	-1.41962	-1.71964	2.96538	3.20656	0.644421	-0.258623	-2.76709	-0.141134	3.93049	-0.74216	-4.69981	5.17133	2.89329	1.03762	-0.296043	-2.50612	3.85015	0.459162	-1.14528	-1.45065	3.13837	2.05349	4.61904	2.79822	0.679481	-1.32651	-1.93857	-3.18923	6.14799	5.6539	3.94051	0.939409	-0.132857	-2.5718	-1.3126	-2.89908
6	95	60	97.5	97.5		-2.40481	-1.68495	-2.86328	-3.49512	-2.42791	-2.85516	0.755825	0.393059	4.79394	4.25037	-0.515604	-1.23373	0.775208	0.130343	5.22728	2.99842	-3.47773	-3.5668	-0.902439	1.32188	-3.08643	-3.73725	-2.23684	-2.31229	-0.911319	-1.95238	0.936635	0.081741	1.13565	1.04681	-3.17727	-3.53869	-3.0355	-3.17659	-0.496668	-0.900296	-3.33213	-2.99461	-2.30842	-2.91769	-1.22129	-1.4338	3.04331	2.02861
7	100	85	97.5	100		1.15942	1.36758	0.056863	-0.433055	-1.66368	-1.49826	-0.203073	0.890663	1.22936	1.22189	-1.40929	0.561677	-0.787672	0.021987	1.60225	2.69589	-1.35997	-1.90665	-1.65436	3.63948	-1.99376	-1.08096	-1.77777	-1.71814	-0.331701	-0.254137	-0.551173	0.538281	-1.21042	0.244269	-0.609572	-2.01943	-2.46772	-1.74809	-0.959681	-1.03807	-0.770885	0.166307	-0.405303	-1.16458	-1.97065	-1.06799	0.477895	0.789727
8	100	100	100	100		2.86538	4.21718	-0.152467	1.86636	-0.463341	1.2937	1.38021	1.13402	2.11542	2.42829	-0.9303	4.43111	-1.34942	2.43118	0.00459	2.24647	0.813661	-1.45597	0.662068	6.2933	-0.843811	0.017162	-0.815565	-0.290557	-0.83514	2.97714	-0.577504	1.07749	0.314544	4.2478	0.598321	0.985138	-1.21695	-0.716502	0.736463	0.555881	1.04614	1.82767	-0.900924	0.9985	-0.34193	0.147237	2.11714	2.18676
9	100	97.5	97.5	100		1.68546	0.0133	-1.8117	-3.27094	1.15489	-0.672113	3.77896	2.09397	7.97246	4.19308	0.341285	-1.4064	0.531927	0.388637	5.54893	4.37085	-4.10518	-1.6272	1.45323	0.402456	-3.11378	-3.81703	0.760491	-0.110668	0.593758	-0.992491	2.5922	0.933643	0.853093	-0.211783	-3.45406	-3.86343	-1.02561	-1.27742	2.50268	1.01817	-0.984132	-2.2716	-1.22695	-2.46471	2.70124	0.295598	5.08905	2.73113
10	100	92.5	97.5	95		7.27722	7.57833	4.28289	3.7719	0.939606	-0.83002	-0.133546	-2.18738	-0.504138	-2.52334	4.61123	2.88333	0.626202	-0.965666	0.096603	-2.10408	3.8182	0.237955	-2.556	2.55323	2.35148	1.55896	-0.514916	-1.43812	2.85609	0.895031	0.162997	-1.37919	1.95075	0.661808	3.63477	3.55871	0.954018	-0.601751	-1.40202	-2.29968	4.93338	5.12711	2.82521	0.306709	-0.316524	-1.14681	-0.038602	-2.65157
11	100	97.5	100	100		5.51827	4.94549	0.739264	1.57174	0.700362	-0.963461	5.56476	3.3814	5.17048	4.09344	1.48207	4.66051	-0.230749	1.97708	3.7614	5.37377	-2.16209	-2.58088	1.8278	7.50897	-2.10987	-2.05497	1.24239	0.007802	0.528535	2.02091	1.94579	1.71402	1.27371	4.08822	-1.04864	-0.441316	-1.23289	-1.58724	4.16856	1.76389	1.42752	2.03286	-0.576608	-0.545676	2.89882	0.597519	6.58933	4.06099
12	100	90	95	100		-0.455488	-0.59151	-2.2065	-2.25598	-1.32294	-1.10998	-0.054431	0.655383	3.23883	2.58936	-0.42552	-0.797534	-0.412687	-0.136364	3.07691	1.96474	-2.15261	-1.14195	-0.745128	0.6491	-2.4259	-1.42866	-1.26294	-0.623821	-0.996192	-1.06474	-0.069245	0.502573	0.426155	0.138922	-2.41194	-2.42684	-1.8694	-1.67011	-0.543471	-0.450163	-2.10038	-1.74492	-2.32357	-1.60081	-0.976151	-0.5378	1.5355	1.80292
13	97.5	97.5	92.5	100		-3.46344	-4.19795	-4.49891	-5.17665	-0.573183	-2.1248	5.98113	5.06569	5.66519	7.3168	-2.63431	-5.51678	0.832025	-1.96149	8.17938	4.10018	-5.52611	-3.84863	3.97021	-3.79596	-4.07551	-4.85248	0.793758	0.163224	-1.53223	-3.71688	3.70077	0.646177	-1.0068	-3.33289	-5.10104	-5.08402	-2.73406	-3.06219	4.36205	4.43441	-4.76427	-5.15117	-2.61365	-4.19935	2.23483	0.260335	7.64454	8.32977
14	100	90	100	100		1.71858	3.11684	-1.8171	-1.79116	-1.04453	-1.33564	3.40125	2.17071	8.08669	5.85119	-2.76312	0.972623	-1.20758	0.074281	6.13553	3.24269	-2.95379	-2.58786	1.25144	2.30964	-2.29501	-3.25843	-0.006355	-1.00033	-1.69667	-0.762643	0.955579	0.69804	-1.44669	1.5751	-2.80644	-2.91959	-2.11378	-2.50302	2.38702	0.682042	-1.44128	-0.305499	-1.31461	-2.19741	0.550053	-0.247065	7.42732	3.82195
15	100	100	97.5	100		1.13124	0.57705	0.462616	0.535016	-0.189958	-0.268746	0.668946	1.35858	-1.51457	-0.380142	2.09082	-0.011251	0.782309	0.612699	-0.374888	0.869965	0.68972	-1.36621	1.06301	1.79781	-0.633708	-0.528675	-0.02405	0.135351	0.596982	0.416192	0.274482	0.915843	1.77682	0.816582	0.546478	0.458454	-0.787462	-0.805336	0.754182	1.20717	2.02061	1.70424	-0.197168	-0.286152	0.318661	0.525161	0.093366	1.0787
16	97.5	95	97.5	95		-2.36891	-1.43573	-0.67835	-1.78635	-0.955377	-0.410672	0.980278	0.089093	0.849764	0.662657	-0.951859	-1.19687	0.711814	0.57829	0.79087	1.15268	-1.81917	-1.52367	0.046391	-0.077389	-1.57336	-1.4781	-1.40493	-1.43395	-0.187021	-1.09711	-0.06903	0.642177	-0.315562	-1.28899	-1.82065	-1.47141	-1.89192	-2.02817	0.281393	-0.420395	-1.79823	-2.19254	-0.710108	-1.18713	-0.281112	-1.0637	2.27102	1.15386
17	92.5	85	95	77.5		0.329015	1.55137	-2.62183	-3.45133	-1.4997	-2.98843	-0.089655	-1.05216	1.98844	1.25168	1.10955	0.353346	2.52279	0.75951	5.00581	3.61327	-3.78357	-4.74279	-2.34844	3.94752	-3.45314	-4.49389	-2.82509	-3.15488	0.170663	-1.62185	1.55801	0.223423	2.89099	1.92164	-3.24147	-4.00302	-3.42273	-4.53263	-1.4723	-2.05277	-1.66588	-1.86184	-2.25292	-4.18905	-0.666445	-1.83961	0.21038	-0.375019
18	100	80	100	100		0.624356	0.95962	0.538187	-0.069835	0.363828	0.759475	3.07677	3.25716	3.63864	4.44637	-0.886655	0.148986	-0.4687	0.007354	1.5856	2.77392	-0.26407	-0.148096	1.94579	1.37437	0.648314	0.651026	1.51008	1.29856	-0.208718	-0.166044	0.937626	1.65025	-0.605804	0.204893	-0.121882	-0.090542	0.560799	0.864371	1.80036	2.72322	0.27336	-0.171064	0.404597	0.183264	2.50535	1.52864	4.27331	4.35423
19	95	100	97.5	100		4.21566	4.97423	-3.19505	-2.50248	-1.50644	-1.36111	5.71279	6.85851	7.80006	7.31505	-3.53998	0.825436	0.300773	0.87003	5.38858	6.43907	-4.4612	-3.86035	2.13879	4.69303	-4.61192	-3.05492	-0.468425	0.227802	-2.24363	-1.4876	2.16839	2.9162	-0.205741	1.92841	-3.79405	-3.42885	-3.61282	-3.72229	3.36954	3.17261	-1.84163	-1.03046	-3.78583	-2.35751	0.650118	1.57595	9.80321	8.81052
20	100	100	100	100		13.435	13.5824	1.81679	3.41888	-0.599232	-0.205207	-0.610182	0.378822	0.275373	1.95907	2.64055	5.40192	-0.36082	1.76687	0.907725	2.02094	1.51	-2.18688	-1.84594	5.51551	-0.666529	-0.874602	-1.62373	-1.36241	0.809375	2.98471	0.195991	0.670021	1.63152	3.6699	0.851942	0.066771	-1.75027	-1.56656	-1.4333	-0.88141	5.07785	5.21369	0.065045	0.867593	-0.814661	-0.575408	-0.004594	0.408194
21	97.5	92.5	100	97.5		-0.639914	-0.584373	-1.8935	-1.25078	-0.109121	-0.785787	0.101333	0.620173	1.04888	0.280551	-1.61325	-1.55229	0.157354	0.332481	1.18262	1.40118	-0.411438	-0.846954	-1.20748	-0.457237	-0.751265	0.366501	-0.88129	-0.861244	-1.22645	-0.286868	0.052282	0.381727	0.674305	0.741678	-0.815367	-0.247999	-0.706295	-1.06454	-0.810256	-0.768366	-1.99355	-0.888948	-0.636783	-0.669122	-0.497547	-0.365647	0.238914	0.078783
22	97.5	97.5	100	100		9.82897	7.32621	3.89292	2.7794	1.23867	-0.04669	-1.04489	-0.672889	-1.95145	-0.435347	4.58668	-0.15067	-0.04997	-0.839962	-0.262523	-0.634645	2.5835	-0.069077	-1.85878	-2.6606	2.00426	0.864997	-1.24264	-1.16622	1.83494	0.123629	-0.573929	-0.747275	2.37894	-0.659822	3.55336	2.53408	0.16687	-1.33883	-1.44603	-1.38987	5.46588	4.42893	2.84907	1.23639	-0.460887	-0.817771	-1.43304	-0.452439
23	97.5	97.5	100	100		-0.678966	-1.1251	0.179897	0.631303	-0.179695	0.385784	0.395935	1.13039	1.75923	1.77777	-1.46703	-0.155425	-1.84725	-1.67713	1.69173	2.89095	-0.886994	-0.954282	-0.698639	0.833339	0.012248	-0.367688	-0.102004	0.732869	0.310025	-1.55778	0.142502	0.928016	-2.27969	-0.552159	0.054435	-2.17562	-0.348847	-0.748275	-0.067909	-0.113801	-0.41701	2.45904	0.66313	-0.246828	-0.152971	0.319794	1.15419	0.909552
24	100	90	100	95		2.31195	3.93632	-1.36708	0.025003	-1.47905	-1.18086	-0.681393	0.841115	2.69213	2.57149	-2.23673	1.64442	-2.84096	1.13514	2.09262	6.87447	-1.06742	-2.68208	-2.83767	2.9001	-1.62043	-1.78457	-1.94612	-2.67394	-1.92072	0.439234	-1.59152	1.85922	-1.64652	1.471	-1.30426	-1.035	-1.83439	-2.63674	-1.61238	-1.77017	-0.512698	0.647679	-1.42866	-0.562292	-1.64721	-0.918191	0.945776	0.984224
25	100	100	97.5	100		3.72485	3.96763	1.46726	1.68535	-0.392394	-0.331887	2.85523	1.92748	2.1849	2.2987	2.1642	2.47685	-0.138909	0.751748	1.23214	3.22432	0.515393	-2.6055	0.980011	2.61326	0.40423	-0.478314	-0.306192	-0.402587	1.4339	1.12253	0.328521	0.994551	1.11171	1.59929	1.18658	0.609715	-1.355	-1.28994	1.81675	1.07204	1.91971	2.45667	0.823774	0.025795	0.651216	0.428266	3.4952	2.70479
26	100	95	100	100		5.45371	5.08555	0.858677	0.467232	-1.33596	-2.25452	-1.26397	-2.44194	-0.721596	-2.15703	0.776029	1.52921	-0.015786	-0.650275	1.74928	0.235622	1.03679	-2.49894	-2.97991	1.43879	-0.459995	-0.271077	-2.89321	-2.62166	0.071276	0.156598	-0.341488	-1.64148	0.259489	0.17882	0.181119	0.708634	-1.91072	-2.09019	-2.88335	-3.32984	3.11222	2.17198	0.019249	-0.23163	-1.65195	-2.58599	-0.771811	-2.39805
27	100	100	97.5	97.5		1.14451	1.02232	0.590333	-0.25083	-0.046098	-1.1359	0.937986	-0.81634	1.28107	-1.08374	1.46046	-0.004258	0.77492	-1.16533	3.37994	-0.008001	-0.688153	-1.95525	-1.07949	0.713888	-0.332082	-1.07847	-0.584968	-1.52355	1.47209	-0.393651	1.70643	-1.1433	1.90875	0.366982	-0.552916	-1.30225	-0.592379	-1.03493	0.010428	-0.84807	0.415888	-0.091134	0.755865	-0.810305	0.450677	-0.752496	1.10208	-0.891894
28	95	90	97.5	100		0.82898	1.15014	0.249753	0.557984	0.249842	-0.566092	0.770612	1.34399	-0.031153	1.16128	0.371211	1.71822	-0.307125	0.14493	1.63597	3.19577	-0.260981	-2.30071	-0.122622	0.556795	-0.783602	0.944885	-0.748902	-1.62809	-0.034743	1.23025	0.6023	1.06325	0.393239	0.900555	-0.290846	0.067846	-1.6732	-1.84695	-0.62671	-0.261651	1.06223	0.406134	0.688338	0.299479	0.853555	0.32286	0.0266	0.761103
[truncated: 964 more columns]
